# Supplementary material for: Intriguing Cytotoxicity of the Street Dissociative Anesthetic Methoxphenidine: Unexpected Impurities Spotted
Source: MDPI journal article supplement (doi:10.3390/ijms23042083), 2022-02-14
Supplement: s1 [file s1]

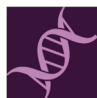

# Supplementary information

## Intriguing cytotoxicity of the street dissociative anesthetic methoxphenidine: Unexpected impurities spotted

Bronislav Jurásek <sup>1,2</sup>, Silvie Rimpelová <sup>3,\*</sup>, Martin Babor <sup>4</sup>, Jan Čejka <sup>4</sup>, Vilém Bartůněk <sup>5</sup> and Martin Kuchař <sup>1,2,\*</sup>

<sup>1</sup> Forensic Laboratory of Biologically Active Substances, Department of Chemistry of Natural Compounds University of Chemistry and Technology Prague, Technická 5, 166 28, Prague 6, Czech Republic; broni-slav.jurasek@vscht.cz; martin.kuchar@vscht.cz

<sup>2</sup> Department of Experimental Neurobiology, National Institute of Mental Health, Topolová 748, 250 67 Klecany, Czech Republic

<sup>3</sup> Department of Biochemistry and Microbiology, University of Chemistry and Technology Prague, Technická 5, 166 28, Prague 6, Czech Republic; silvie.rimpelova@vscht.cz

<sup>4</sup> Department of Solid State Chemistry, University of Chemistry and Technology Prague, Technická 5, 166 28 Prague 6, Czech Republic; martin.babor@vscht.cz; jan.cejka@vscht.cz

<sup>5</sup> Department of Inorganic Chemistry, University of Chemistry and Technology Prague, Technická 5, 166 28 Prague 6, Czech Republic; vilem.bartunek@vscht.cz

\* Correspondence: martin.kuchar@vscht.cz (M.K.); silvie.rimpelova@vscht.cz (S.R.)

**Citation:** Jurásek, B.; Rimpelová, S.; Babor, M.; Čejka, J.; Bartůněk, V.; Kuchař, M. Intriguing Cytotoxicity of the Street Dissociative Anesthetic Methoxphenidine: Unexpected Impurities Spotted. *Int. J. Mol. Sci.* **2022**, *23*, 2083. <https://doi.org/10.3390/ijms23042083>

Academic Editor: Rosaria Acquaviva

Received: 29 October 2021

Accepted: 11 February 2022

Published: 14 February 2022

**Publisher's Note:** MDPI stays neutral with regard to jurisdictional claims in published maps and institutional affiliations.

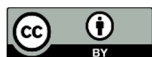

**Copyright:** © 2022 by the author. Licensee MDPI, Basel, Switzerland. This article is an open access article distributed under the terms and conditions of the Creative Commons Attribution (CC BY) license (<https://creativecommons.org/licenses/by/4.0/>).

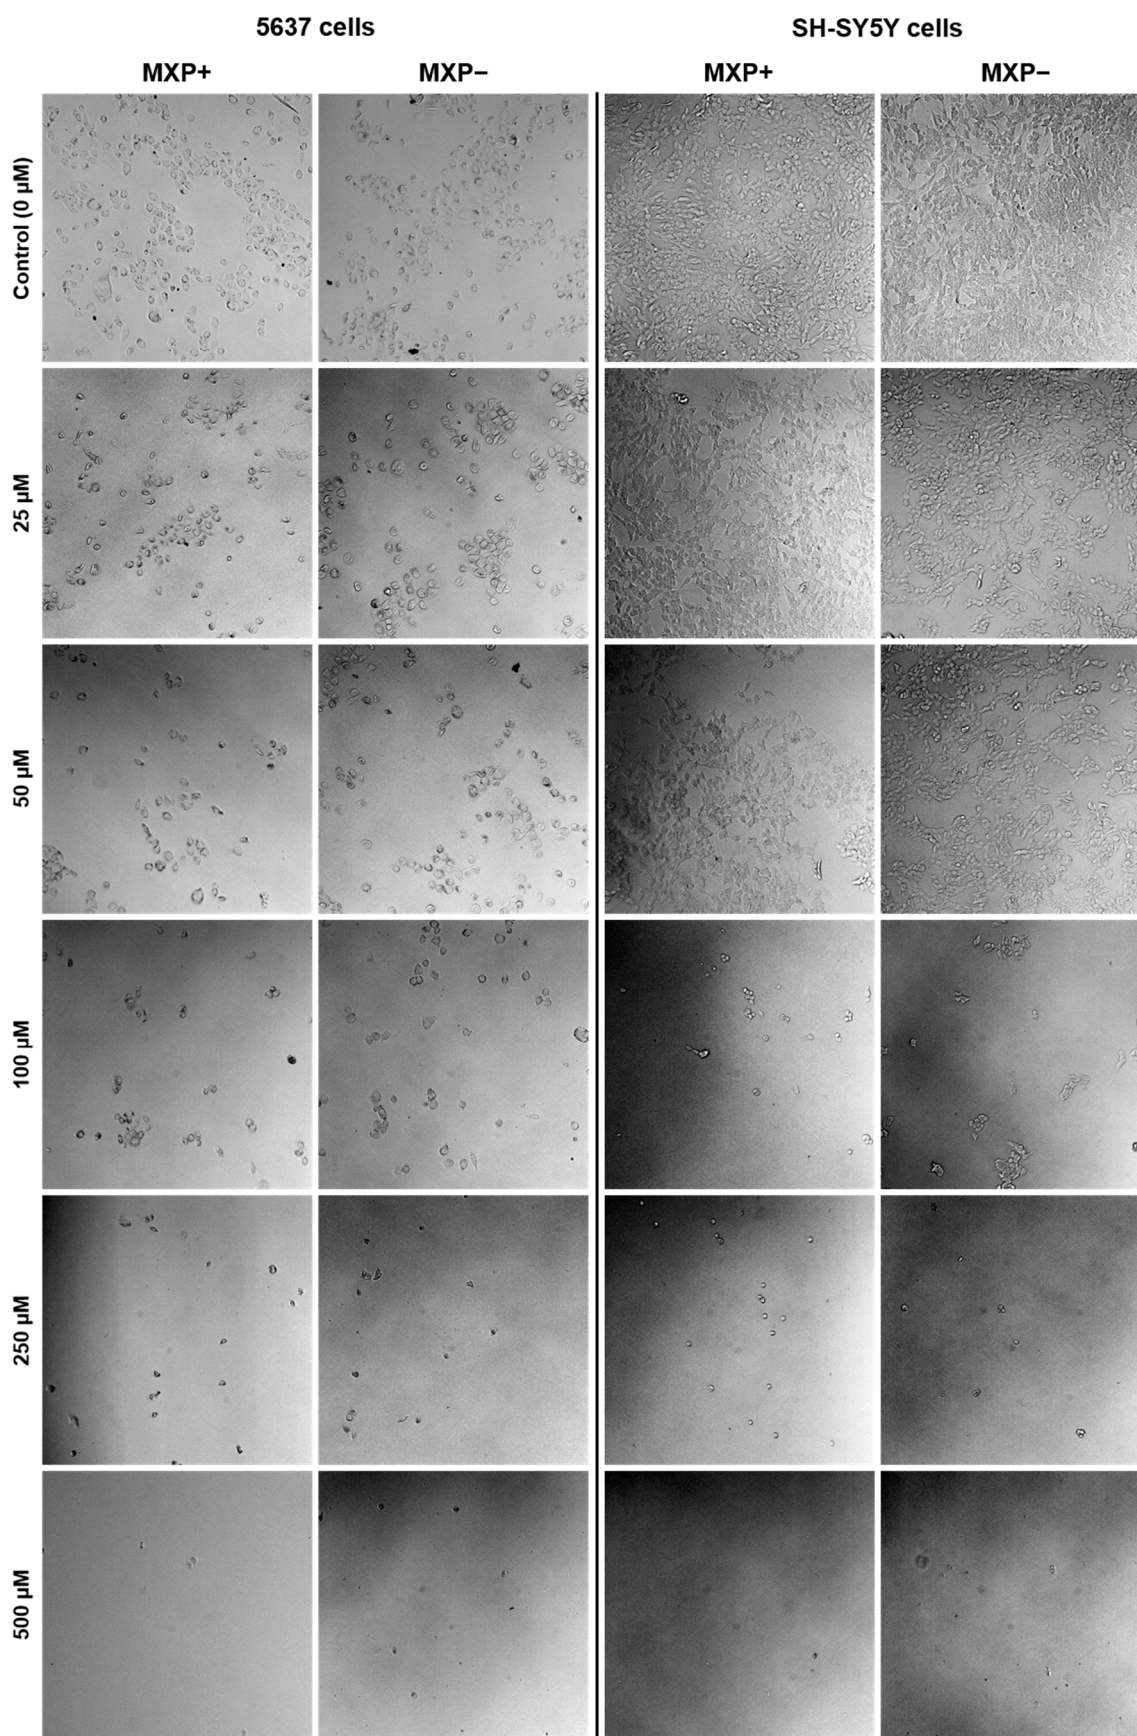

**Figure S1.** Bright field images of human cells derived from urinary bladder carcinoma (5637) and neuroblastoma (SH-SY5Y) treated with a street sample of methoxphenidine (MXP) containing inorganic impurities (MXP+) and its synthetic standard (MXP-). The 5637 and SH-SY5Y cells were treated with a 0–500- $\mu$ M concentration of MXP for 72 h. First and third columns represent cells treated with MXP+, the second and fourth columns cells treated with MXP-.
